# Supplementary material for: Comparison of nicotine emissions rate, ‘nicotine flux’, from heated, electronic and combustible tobacco products: data, trends and recommendations for regulation
Source: HighWire-hosted journal article supplement (doi:10.1136/tobaccocontrol-2021-056850), 2022-01-27
Supplement: tobaccocontrol-2021-056850supp001_data_supplement.pdf [file tobaccocontrol-2021-056850supp001_data_supplement.pdf]

**COMPARISON OF NICOTINE EMISSIONS RATE, “NICOTINE FLUX”, FROM HEATED, ELECTRONIC, AND COMBUSTIBLE TOBACCO PRODUCTS: DATA, TRENDS, AND RECOMMENDATIONS FOR REGULATION**

Mario El Hourani<sup>1,3</sup>, ME; Alan Shihadeh<sup>1,3</sup>, ScD\*; Soha Talih<sup>1,3</sup>, PhD; Thomas Eissenberg<sup>2,3</sup>, PhD; and the CSTP Nicotine Flux Work Group

<sup>1</sup>Mechanical Engineering Department, Maroun Semaan Faculty of Engineering and Architecture, American University of Beirut, Bliss Street, PO. Box 11-0236, Beirut, Lebanon

<sup>2</sup>Department of Psychology, Virginia Commonwealth University, 821 West Franklin Street, Richmond, Virginia 23284, United States

<sup>3</sup>Center for the Study of Tobacco Products, Virginia Commonwealth University, 821 West Franklin Street, Richmond, Virginia 23284, United States

\* Corresponding Author: Alan Shihadeh

Tel: + 961 1 344444

Email address: as20@aub.edu.lb

Address: American University of Beirut  
PO Box 11-0236 Beirut, Lebanon

## SUPPLEMENTAL MATERIAL

**Table S1.** Summary of the nicotine yield and flux of various tobacco products and the corresponding puffing topography parameters.

\* Average puff number under ISO smoking regime was used.

| Tobacco Product                                            | Brand                                                       | Puff Number | Puff duration (s) | Nicotine Yield (mg/unit) | Nicotine Flux ( $\mu\text{g/s}$ ) | Reference | Year of Publication |
|------------------------------------------------------------|-------------------------------------------------------------|-------------|-------------------|--------------------------|-----------------------------------|-----------|---------------------|
| Cigarettes                                                 | Maintained nicotine cigarette                               | 15          | 2                 | 2.7                      | 90.0                              | [1]       | 1988                |
|                                                            | Middle tar cigarette                                        | 15          | 2                 | 2.9                      | 96.7                              |           |                     |
|                                                            | Low tar cigarette                                           | 14          | 2.5               | 1.8                      | 51.4                              |           |                     |
|                                                            | Regular-yield brands (9-15 mg ISO tar)                      | 11.5        | 1.4               | 2                        | 124.2                             | [2]       | 2006                |
|                                                            | Matinee extra mild (4 mg ISO tar)                           | 13.4        | 1.6               | 1.5                      | 70.0                              |           |                     |
|                                                            | Own brand (female smokers)                                  | 13.5        | 1.33              | 1.92                     | 106.9                             | [3]       | 2007                |
|                                                            | Own brand (male smokers)                                    | 12          | 1.48              | 2.2                      | 123.9                             |           |                     |
|                                                            | Kent (non-menthol cigarette)                                | 14.4        | 1.17              | 0.9                      | 53.4                              | [4]       | 2017                |
|                                                            | Benson & Hedges Light (menthol cigarette)                   | 15.1        | 1.23              | 1.05                     | 56.5                              |           |                     |
|                                                            | Marlboro red                                                | 12.2        | 1.68              | 2.54                     | 123.9                             | [5]       | 2020                |
|                                                            | Lucky Strike                                                | 10.7        | 1.8               | 1.3                      | 67.5                              | [6]       | 2018                |
|                                                            | Lucky Strike Menthol                                        | 10          | 2                 | 1.3                      | 65.0                              |           |                     |
|                                                            | Lucky Strike                                                | 16.6        | 1.6               | 1.5                      | 56.5                              | [7]       | 2020                |
|                                                            | Low-yield cigarettes ( $\leq 0.8$ mg of nicotine/cigarette) | 12.7        | 1.5               | 1.7                      | 89.2                              | [8]       | 2000                |
|                                                            | Medium-yield cigarettes (0.9–1.2 mg of nicotine/cigarette)  | 12.1        | 1.5               | 2.39                     | 131.7                             |           |                     |
|                                                            | 2R4F                                                        | 9.5         | 2                 | 0.829                    | 43.6                              | [9]       | 2014                |
|                                                            | 1R6F                                                        | 8.0         | 2                 | 0.73                     | 45.6                              | [10]      | 2018                |
|                                                            | 1R6F                                                        | 8.4         | 2                 | 2.34                     | 139.3                             |           |                     |
|                                                            | 3R4F                                                        | 9.0         | 2                 | 0.74                     | 41.1                              |           |                     |
|                                                            | 3R4F                                                        | 10.7        | 2                 | 2.38                     | 111.2                             |           |                     |
|                                                            | Regular-yield brands (9-15 mg ISO tar)                      | 9           | 2                 | 1.1                      | 61.1                              | [2]       | 2006                |
|                                                            |                                                             | 12.1        | 2                 | 2.4                      | 99.2                              |           |                     |
|                                                            | Low-yield cigarettes ( $\leq 0.8$ mg of nicotine/cigarette) | 9           | 2                 | 0.7                      | 38.9                              | [8]       | 2000                |
| Medium-yield cigarettes (0.9–1.2 mg of nicotine/cigarette) | 9                                                           | 2           | 1.11              | 61.7                     |                                   |           |                     |
| Marlboro Ultra Smooth                                      | 7.2                                                         | 2           | 0.42              | 29.2                     | [11]                              | 2006      |                     |
|                                                            | 6.9                                                         | 2           | 1.09              | 79.0                     |                                   |           |                     |
| Marlboro Regular                                           | 12                                                          | 2           | 1.99              | 82.9                     | [12]                              | 2018      |                     |
| VLNC                                                       | VLN King                                                    | 9*          | 2                 | 0.03                     | 1.7                               | [13]      | 2019                |
| Roll Your Own Cigarettes                                   | Average of 13 brands                                        | 12.4        | 2                 | 1.3                      | 52.4                              | [14]      | 1985                |
|                                                            | Average of 11 brands                                        | 9.42        | 2                 | 1.90                     | 100.8                             | [15]      | 2014                |
|                                                            | Average of 517 cigarettes made by 26 regular users          | 12.3        | 2                 | 1.30                     | 52.8                              | [16]      | 1998                |
| Tobacco Heating Products                                   | glo with Bright Tobacco Kent Neostiks                       | 11.6        | 1.8               | 0.3                      | 14.4                              | [6]       | 2018                |
|                                                            | glo with mentholated Intensely Fresh Kent Neostiks          | 10          | 1.8               | 0.3                      | 16.7                              |           |                     |
|                                                            | iQOS with Essence tobacco HeatStick                         | 10.55       | 1.8               | 0.9                      | 47.4                              |           |                     |
|                                                            | glo with Bright Tobacco Kent Neostiks                       | 15.4        | 1.6               | 0.34                     | 13.8                              | [7]       | 2020                |
|                                                            | iQOS with Essence tobacco HeatStick                         | 15          | 1.4               | 0.98                     | 46.7                              |           |                     |

|                                             |                                                                                                                                                   |      |      |       |      |      |      |
|---------------------------------------------|---------------------------------------------------------------------------------------------------------------------------------------------------|------|------|-------|------|------|------|
|                                             | carbon-based Eclipse                                                                                                                              | 25   | 2    | 2.36  | 47.2 | [17] | 2019 |
|                                             | Glo with Bright Tobacco Kent Neostiks                                                                                                             | 8    | 2    | 0.462 | 28.9 | [18] | 2018 |
|                                             | Glo with mentholated Intensely Fresh Kent Neostiks                                                                                                | 8    | 2    | 0.365 | 22.8 |      |      |
|                                             | Unspecified Heat not Burn Device                                                                                                                  | 12   | 2    | 1.4   | 58.3 | [12] | 2018 |
|                                             | Unspecified Heat not Burn Device with Mentholated flavor                                                                                          | 12   | 2    | 1.38  | 57.5 |      |      |
|                                             | Unspecified Heat not Burn Device                                                                                                                  | 12   | 4    | 1.41  | 29.4 |      |      |
|                                             | Unspecified Heat not Burn Device with Mentholated flavor                                                                                          | 12   | 4    | 1.43  | 29.8 |      |      |
|                                             | Carbon-based Eclipse                                                                                                                              | 12   | 2    | 0.14  | 5.8  | [17] | 2019 |
| Carbon-based Eclipse                        | 18.3                                                                                                                                              | 2    | 0.56 | 15.3  |      |      |      |
| <b>Electronic Nicotine Delivery Systems</b> | <i>Volish, eGo-3 (nicotine concentration 18 mg/ml; liquid composition: Propylene glycol, nicotine, vanillin, linalool, flavorings)</i>            | 15   | 2.8  | 1.06  | 25.2 | [19] | 2015 |
|                                             | <i>Volish, eGo-3 (nicotine concentration 18 mg/ml; liquid composition: Propylene glycol, glycerin, nicotine, ethanol, flavorings)</i>             | 15   | 2.8  | 1.15  | 27.4 |      |      |
|                                             | <i>Volish, eGo-3 (nicotine concentration 24 mg/ml; liquid composition: Glycerin, nicotine, propylene glycol, linalool, vanillin, flavorings)</i>  | 15   | 2.8  | 1.05  | 25.0 |      |      |
|                                             | <i>Volish, eGo-3 (nicotine concentration 22 mg/ml; liquid composition: Glycerin, propylene glycol, nicotine, flavorings)</i>                      | 15   | 2.8  | 1.43  | 34.0 |      |      |
|                                             | <i>Volish, eGo-3 (nicotine concentration 12 mg/ml; liquid composition: Glycerin, propylene glycol, nicotine, flavorings)</i>                      | 15   | 2.8  | 0.88  | 21.0 |      |      |
|                                             | <i>Volish, eGo-3 (nicotine concentration 16 mg/ml; liquid composition: Glycerin, propylene glycol, nicotine, flavorings)</i>                      | 15   | 2.8  | 1.02  | 24.3 |      |      |
|                                             | <i>Volish, eGo-3 (nicotine concentration 25 mg/ml; liquid composition: Glycerin, propylene glycol, nicotine, ethanol, flavorings)</i>             | 15   | 2.8  | 1.36  | 32.4 |      |      |
|                                             | <i>Volish, eGo-3 (nicotine concentration 28 mg/ml; liquid composition: Glycerin, propylene glycol, nicotine, ethanol, malic acid, flavorings)</i> | 15   | 2.8  | 1.49  | 35.5 |      |      |
|                                             | <i>Volish, eGo-3 (nicotine concentration 11 mg/ml; liquid composition: Glycerin, nicotine, menthol, vanillin, aromatic oils, vanilla)</i>         | 15   | 2.8  | 0.77  | 18.3 |      |      |
|                                             | <i>Blu Cigs (Tobacco-flavored cartomizers with nicotine concentration of 16 mg/ml)</i>                                                            | 33   | 2.75 | 1.2   | 13.2 | [20] | 2015 |
|                                             | <i>V2 Cigs (Tobacco-flavored cartomizers with nicotine concentration of 18 mg/ml)</i>                                                             | 31   | 2.54 | 1.4   | 17.8 |      |      |
|                                             | <i>Lab Assembled ECIG 6 W (E-liquid concentration range 6-18 mg/ml)</i>                                                                           | 57   | 4.6  | 3.5   | 13.3 | [21] | 2018 |
|                                             | <i>Lab Assembled ECIG 10 W (E-liquid concentration range 6-18 mg/ml)</i>                                                                          | 46   | 3.8  | 4.2   | 24.0 |      |      |
|                                             | <i>KangerTech Mini ProTank with own flavor (E-liquid nicotine concentration range 1.6-16.7 mg/ml and PG/VG ratio range of 69/31-5/95)</i>         | 106  | 4.3  | 3.4   | 7.5  | [22] | 2018 |
|                                             | <i>KangerTech Mini ProTank with strawberry flavored e-liquid (E-liquid nicotine concentration 19.9 mg/ml and PG/VG ratio of 40/60)</i>            | 73   | 3.2  | 5.4   | 23.1 |      |      |
|                                             | <i>KangerTech Mini ProTank with Tobacco flavored e-liquid (E-liquid nicotine concentration 19.3 mg/ml and PG/VG ratio of 44/56)</i>               | 69   | 2.8  | 4.1   | 21.2 |      |      |
|                                             | <i>Vype with 'Twilight Tobacco' flavored e-liquid (E-liquid nicotine concentration 5 mg/ml and PG/VG ratio of 40/60)</i>                          | 61.1 | 1.45 | 0.75  | 8.5  | [7]  | 2020 |
|                                             | Vapour 2 cigs (E-liquid nicotine concentration 20 mg/ml and PG/VG ratio of 50/50)                                                                 | 12   | 2    | 0.46  | 19.2 | [12] | 2018 |
|                                             |                                                                                                                                                   | 12   | 4    | 0.86  | 17.9 |      |      |
|                                             | eGo style, Epsilon (E-liquid nicotine concentration 20 mg/ml and PG/VG ratio of 50/50)                                                            | 12   | 2    | 0.51  | 21.3 |      |      |
|                                             | 12                                                                                                                                                | 4    | 1.73 | 36.0  |      |      |      |

|                                                                    |                                                                                                                       |      |       |       |       |      |      |      |
|--------------------------------------------------------------------|-----------------------------------------------------------------------------------------------------------------------|------|-------|-------|-------|------|------|------|
|                                                                    | EVIC VTC Mini battery with Nautilus Mini atomizer (E-liquid nicotine concentration 20 mg/ml and PG/VG ratio of 50/50) | 12   | 2     | 0.82  | 34.2  |      |      |      |
|                                                                    |                                                                                                                       | 12   | 4     | 1.84  | 38.3  |      |      |      |
| <b>Electronic Nicotine Delivery Systems</b>                        | Vype Disposable Regular                                                                                               | 1    | 3     | 0.04  | 13.3  | [17] | 2019 |      |
|                                                                    |                                                                                                                       | 1    | 5     | 0.06  | 12.0  |      |      |      |
|                                                                    | Intellicig XL                                                                                                         | 1    | 3     | 0.03  | 10.0  |      |      |      |
|                                                                    |                                                                                                                       | 1    | 5     | 0.07  | 14.0  |      |      |      |
|                                                                    | V4L CoolCart cartomizers (8.53 mg/ml nicotine concentration)                                                          |      | 2     | 15    | 0.11  | 3.7  | [23] | 2015 |
|                                                                    |                                                                                                                       |      | 4     | 15    | 0.30  | 5.0  |      |      |
|                                                                    |                                                                                                                       |      | 4     | 15    | 0.29  | 4.8  |      |      |
|                                                                    |                                                                                                                       |      | 8     | 15    | 0.72  | 6.0  |      |      |
|                                                                    |                                                                                                                       |      | 8     | 15    | 0.68  | 5.7  |      |      |
|                                                                    |                                                                                                                       |      | 2     | 15    | 0.64  | 21.3 |      |      |
|                                                                    |                                                                                                                       |      | 4     | 15    | 1.18  | 19.7 |      |      |
|                                                                    |                                                                                                                       |      | 4     | 15    | 1.50  | 25.0 |      |      |
|                                                                    |                                                                                                                       |      | 8     | 15    | 3.23  | 26.9 |      |      |
|                                                                    |                                                                                                                       |      | 8     | 15    | 3.09  | 25.8 |      |      |
|                                                                    | V4L CoolCart cartomizers (15.73 mg/ml nicotine concentration)                                                         |      | 4     | 15    | 0.48  | 8.0  | [23] | 2015 |
|                                                                    |                                                                                                                       |      | 8     | 15    | 4.7   | 39.2 |      |      |
|                                                                    | JUUL US - Tobacco flavor ( 65 mg/ml nicotine concentration)                                                           | 15   | 4     | 1.3   | 21.7  | [24] | 2020 |      |
|                                                                    | JUUL UK - Tobacco flavor (19 mg/ml nicotine concentration)                                                            | 15   | 4     | 0.4   | 6.7   |      |      |      |
|                                                                    | JUUL US - Tobacco flavor ( 69 mg/ml nicotine concentration)                                                           | 15   | 4     | 2.07  | 34.5  | [25] | 2019 |      |
|                                                                    | JUUL US - Tobacco flavor                                                                                              | 1    | 2.5   | 0.157 | 62.8  | [26] | 2019 |      |
| JUUL US – Crème brulee flavor                                      | 1                                                                                                                     | 2.5  | 0.170 | 68.0  |       |      |      |      |
| JUUL US – Fruit punch flavor                                       | 1                                                                                                                     | 2.5  | 0.154 | 61.6  |       |      |      |      |
| JUUL US - Mint flavor                                              | 1                                                                                                                     | 2.5  | 0.188 | 75.2  |       |      |      |      |
| JUUL US – Tobacco flavor ( 69.8 mg/ml nicotine concentration)      | 15                                                                                                                    | 4    | 1.67  | 27.8  |       |      |      |      |
| Ezzy Oval – Berry Cool flavor (53.8 mg/m nicotine concentration)   | 15                                                                                                                    | 4    | 4.07  | 67.8  | [27]  | 2021 |      |      |
| Ezzy Oval – Mango Lychee flavor (75.4 mg/m nicotine concentration) | 15                                                                                                                    | 4    | 5.44  | 90.7  |       |      |      |      |
| Hyde – Cherry lemonade flavor (86.9 mg/m nicotine concentration)   | 15                                                                                                                    | 4    | 3.15  | 52.5  |       |      |      |      |
| Puff Bar – Banana ice flavor (83.4 mg/m nicotine concentration)    | 15                                                                                                                    | 4    | 6.72  | 112.0 |       |      |      |      |
| SEA – Mint flavor (54.3 mg/m nicotine concentration)               | 15                                                                                                                    | 4    | 1.67  | 27.8  |       |      |      |      |
|                                                                    |                                                                                                                       |      |       |       |       |      |      |      |
| <b>Waterpipes</b>                                                  | -                                                                                                                     | 77.7 | 3.6   | 1.6   | 5.8   | [28] | 2016 |      |
|                                                                    | -                                                                                                                     | 290  | 2.9   | 5     | 5.9   | [29] | 2018 |      |
|                                                                    | -                                                                                                                     | 220  | 2.8   | 4.8   | 7.8   | [30] | 2010 |      |
|                                                                    | -                                                                                                                     | 105  | 2.6   | 5.4   | 19.8  | [31] | 2019 |      |
|                                                                    | -                                                                                                                     | 171  | 2.6   | 2.96  | 6.7   | [32] | 2005 |      |
|                                                                    | -                                                                                                                     | 100  | 3.0   | 2.25  | 7.5   | [33] | 2003 |      |
|                                                                    | -                                                                                                                     | 171  | 2.6   | 6.06  | 13.6  | [34] | 2008 |      |
|                                                                    | -                                                                                                                     | 171  | 2.6   | 7.75  | 17.4  | [35] | 2011 |      |
| <b>Cigarillos</b>                                                  | <i>Black &amp; Mild</i>                                                                                               | 23.1 | 2.8   | 2.3   | 35.6  | [36] | 2018 |      |
|                                                                    | <i>Winchester</i>                                                                                                     | 9.8  | 2     | 1.8   | 91.8  | [36] | 2018 |      |
| <b>Small Cigars</b>                                                | Average values of 8 commercially available small cigars in the US                                                     | 16.6 | 2     | 1.24  | 37.3  | [10] | 2018 |      |
|                                                                    |                                                                                                                       | 16.5 | 2     | 3.49  | 105.8 |      |      |      |

|                       |                                                        |      |        |      |      |          |           |
|-----------------------|--------------------------------------------------------|------|--------|------|------|----------|-----------|
|                       | Little cigars with cigar wrapper (average of 5 brands) | 8.5  | 2      | 1.60 | 94.1 | [37]     | 1976      |
|                       | Little cigars with paper wrapper (average of 5 brands) | 9.4  | 2      | 1.60 | 85.1 |          |           |
|                       | Average of 10 brands                                   | 14.4 | 2      | 2.1  | 72.9 | [14]     | 1985      |
| <b>Large Cigars</b>   | Average of 5 brands                                    | 70.3 | 1.5    | 2.4  | 22.8 | [37]     | 1976      |
|                       | Average of 6 brands                                    | 108  | 1.5    | 1.9  | 11.7 | [14]     | 1985      |
| <b>Kretek</b>         | Sampoerna                                              | 12.6 | 2      | 0.74 | 29.4 | [9]      | 2014      |
|                       | Garam                                                  | 17.3 | 2      | 1.78 | 51.4 |          |           |
|                       | Kretek-R                                               | 14.4 | 2      | 1.72 | 59.7 |          |           |
| <b>Bidi</b>           | Average of 21 brands                                   | 21   | 2      | 2.70 | 64.3 | [38]     | 2003      |
|                       | Average of 24 brands                                   | 17   | 2      | 1.86 | 54.7 | [39]     | 1998      |
| <b>Nicotine Patch</b> | NiQuitin Clear 7 mg                                    | -    | 24 hrs | 7    | 0.08 | [40]     | 2019      |
|                       | NiQuitin Clear 14 mg                                   |      | 24 hrs | 14   | 0.16 |          |           |
|                       | NiQuitin Clear 21 mg                                   |      | 24 hrs | 21   | 0.24 |          |           |
| <b>Nicotine Gum</b>   | Zonnic 2mg                                             | -    | 30 min | 2    | 1.11 | [41, 42] | 2018/2020 |

## REFERENCES

- [1] Armitage AK, Alexander J, Hopkins R, *et al.* Evaluation of a low to middle tar/medium nicotine cigarette designed to maintain nicotine delivery to the smoker. *Psychopharmacology* 1988;96(4):447-453.
- [2] Hammond D, Fong GT, Cummings KM, *et al.* Cigarette yields and human exposure: a comparison of alternative testing regimens. *Cancer epidemiology, biomarkers & prevention : a publication of the American Association for Cancer Research, cosponsored by the American Society of Preventive Oncology* 2006;15(8):1495-1501.
- [3] Melikian A, Djordjevic M, Hosey J, *et al.* Gender Differences Relative to Smoking Behavior and Emissions of Toxins From Mainstream Cigarette Smoke. *Nicotine & tobacco research : official journal of the Society for Research on Nicotine and Tobacco* 2007;9:377-387.
- [4] Watson CV, Richter P, de Castro BR, *et al.* Smoking Behavior and Exposure: Results of a Menthol Cigarette Cross-over Study. *American journal of health behavior* 2017;41(3):309-319.
- [5] Pauwels CGGM, Boots AW, Visser WF, *et al.* Characteristic Human Individual Puffing Profiles Can Generate More TNCO than ISO and Health Canada Regimes on Smoking Machine When the Same Brand Is Smoked. *Int J Environ Res Public Health* 2020;17(9):3225.
- [6] Gee J, Prasad K, Slayford S, *et al.* Assessment of tobacco heating product THP1.0. Part 8: Study to determine puffing topography, mouth level exposure and consumption among Japanese users. *Regulatory Toxicology and Pharmacology* 2018;93:84-91.
- [7] Jones J, Slayford S, Gray A, *et al.* A cross-category puffing topography, mouth level exposure and consumption study among Italian users of tobacco and nicotine products. *Scientific Reports* 2020;10(1):12.
- [8] Djordjevic MV, Stellman SD, Zang E. Doses of Nicotine and Lung Carcinogens Delivered to Cigarette Smokers. *JNCI: Journal of the National Cancer Institute* 2000;92(2):106-111.
- [9] Piadé JJ, Roemer E, Dempsey R, *et al.* Toxicological assessment of kretek cigarettes: Part 2: Kretek and American-blended cigarettes, smoke chemistry and in vitro toxicity. *Regulatory Toxicology and Pharmacology* 2014;70:S15-S25.
- [10] Goel R, Trushin N, Reilly SM, *et al.* A Survey of Nicotine Yields in Small Cigar Smoke: Influence of Cigar Design and Smoking Regimens. *Nicotine & tobacco research : official journal of the Society for Research on Nicotine and Tobacco* 2018;20(10):1250-1257.
- [11] Laugesen M, Fowles J. Marlboro UltraSmooth: a potentially reduced exposure cigarette? *Tobacco control* 2006;15(6):430-435.
- [12] Farsalinos KE, Yannovits N, Sarri T, *et al.* Nicotine Delivery to the Aerosol of a Heat-Not-Burn Tobacco Product: Comparison With a Tobacco Cigarette and E-Cigarettes. *Nicotine & tobacco research : official journal of the Society for Research on Nicotine and Tobacco* 2018;20(8):1004-1009.
- [13] Carmines E, Gillman I. Comparison of the Yield of Very Low Nicotine Content Cigarettes to the Top 100 United States Brand Styles. *Beiträge zur Tabakforschung International/Contributions to Tobacco Research* 2019;28:253-266.
- [14] Rickert WS, Robinson JC, Bray DF, *et al.* Characterization of tobacco products: A comparative study of the tar, nicotine, and carbon monoxide yields of cigars, manufactured cigarettes, and cigarettes made from fine-cut tobacco. *Preventive Medicine* 1985;14(2):226-233.
- [15] Marcilla A, Beltran MI, Gómez-Siurana A, *et al.* Comparison between the mainstream smoke of eleven RYO tobacco brands and the reference tobacco 3R4F. *Toxicol Rep* 2014;1:122-136.
- [16] Darrall KG, Figgins JA. Roll-your-own smoke yields: theoretical and practical aspects. *Tobacco control* 1998;7(2):168-175.

- [17] McAdam K, Davis P, Ashmore L, *et al.* Influence of machine-based puffing parameters on aerosol and smoke emissions from next generation nicotine inhalation products. *Regulatory toxicology and pharmacology : RTP* 2019;101:156-165.
- [18] Forster M, Fiebelkorn S, Yurteri C, *et al.* Assessment of novel tobacco heating product THP1.0. Part 3: Comprehensive chemical characterisation of harmful and potentially harmful aerosol emissions. *Regulatory toxicology and pharmacology : RTP* 2018;93:14-33.
- [19] Kosmider L, Sobczak A, Szołtysek-Bołdys I, *et al.* Assessment of nicotine concentration in electronic nicotine delivery system (ENDS) liquids and precision of dosing to aerosol. *Przegląd lekarski* 2015;72(10):500-504.
- [20] Behar RZ, Hua M, Talbot P. Puffing topography and nicotine intake of electronic cigarette users. *PLoS One* 2015;10(2):e0117222.
- [21] Farsalinos K, Poulas K, Voudris V. Changes in Puffing Topography and Nicotine Consumption Depending on the Power Setting of Electronic Cigarettes. *Nicotine & Tobacco Research* 2018;20(8):993-997.
- [22] St Helen G, Shahid M, Chu S, *et al.* Impact of e-liquid flavors on e-cigarette vaping behavior. *Drug and alcohol dependence* 2018;189:42-48.
- [23] Talih S, Balhas Z, Eissenberg T, *et al.* Effects of user puff topography, device voltage, and liquid nicotine concentration on electronic cigarette nicotine yield: measurements and model predictions. *Nicotine & tobacco research : official journal of the Society for Research on Nicotine and Tobacco* 2015;17(2):150-157.
- [24] Talih S, Salman R, El-Hage R, *et al.* A comparison of the electrical characteristics, liquid composition, and toxicant emissions of JUUL USA and JUUL UK e-cigarettes. *Sci Rep* 2020;10(1):7322.
- [25] Talih S, Salman R, El-Hage R, *et al.* Characteristics and toxicant emissions of JUUL electronic cigarettes. *Tobacco control* 2019;28(6):678.
- [26] Reilly SM, Bitzer ZT, Goel R, *et al.* Free Radical, Carbonyl, and Nicotine Levels Produced by Juul Electronic Cigarettes. *Nicotine & tobacco research : official journal of the Society for Research on Nicotine and Tobacco* 2019;21(9):1274-1278.
- [27] Soha Talih RS, Eric Soule, Racehl El Hage, Ebrahim Karam, Nareg Karaoghlanian, Ahmad El-Hellani, Najat Saliba, Alan Shihadeh. Electrical features, liquid composition and toxicant emissions from 'pod-mod'-like disposable electronic cigarettes (Under Review). 2021.
- [28] Ramôa CP, Shihadeh A, Salman R, *et al.* Group Waterpipe Tobacco Smoking Increases Smoke Toxicant Concentration. *Nicotine & tobacco research : official journal of the Society for Research on Nicotine and Tobacco* 2016;18(5):770-776.
- [29] Jawad M, Eissenberg T, Salman R, *et al.* Toxicant inhalation among singleton waterpipe tobacco users in natural settings. *Tob Control* 2019;28(2):181-188.
- [30] Katurji M, Daher N, Sheheitli H, *et al.* Direct measurement of toxicants inhaled by water pipe users in the natural environment using a real-time in situ sampling technique. *Inhalation toxicology* 2010;22(13):1101-1109.
- [31] El Hourani M, Talih S, Salman R, *et al.* Comparison of CO, PAH, Nicotine, and Aldehyde Emissions in Waterpipe Tobacco Smoke Generated Using Electrical and Charcoal Heating Methods. *Chemical research in toxicology* 2019;32(6):1235-1240.
- [32] Shihadeh A, Saleh R. Polycyclic aromatic hydrocarbons, carbon monoxide, "tar", and nicotine in the mainstream smoke aerosol of the narghile water pipe. *Food and chemical toxicology : an international journal published for the British Industrial Biological Research Association* 2005;43(5):655-661.
- [33] Shihadeh A. Investigation of mainstream smoke aerosol of the argileh water pipe. *Food and chemical toxicology : an international journal published for the British Industrial Biological Research Association* 2003;41(1):143-152.

- [34] Saleh R, Shihadeh A. Elevated toxicant yields with narghile waterpipes smoked using a plastic hose. *Food and chemical toxicology : an international journal published for the British Industrial Biological Research Association* 2008;46(5):1461-1466.
- [35] Schubert J, Hahn J, Dettbarn G, *et al.* Mainstream smoke of the waterpipe: does this environmental matrix reveal as significant source of toxic compounds? *Toxicology letters* 2011;205(3):279-284.
- [36] Pickworth WB, Rosenberry ZR, Yi D, *et al.* Cigarillo and Little Cigar Mainstream Smoke Constituents from Replicated Human Smoking. *Chemical research in toxicology* 2018;31(4):251-258.
- [37] Irwin S, Klaus DB, Dietrich H, *et al.* On the Chemistry of Cigar Smoke: Comparisons between Experimental Little and Large Cigars. *Beiträge zur Tabakforschung International/Contributions to Tobacco Research* 1976;8(6):367-377.
- [38] Watson CH, Polzin GM, Calafat AM, *et al.* Determination of tar, nicotine, and carbon monoxide yields in the smoke of bidi cigarettes. *Nicotine & Tobacco Research* 2003;5(5):747-753.
- [39] Pakhale SS, Maru GB. Distribution of major and minor alkaloids in tobacco, mainstream and sidestream smoke of popular Indian smoking products. *Food and chemical toxicology : an international journal published for the British Industrial Biological Research Association* 1998;36(12):1131-1138.
- [40] Omega Pharma Ltd. NiQuitin Pre-Quit Clear 21mg Patch. *Electronic Medicines Compendium* 2019; <https://www.medicines.org.uk/emc/product/2938/smpc> (accessed 3 December 2021).
- [41] Shiffman S, Scholl SM, Mao J, *et al.* Using Nicotine Gum to Assist Nondaily Smokers in Quitting: A Randomized Clinical Trial. *Nicotine Tob Res* 2020;22(3):390-397.
- [42] Lande RG. What is the role of nicotine gum in the treatment of nicotine addiction? *Medscape* 2018; <https://www.medscape.com/answers/287555-158527/what-is-the-role-of-nicotine-gum-in-the-treatment-of-nicotine-addiction> (accessed 3 December 2021).
